# Supplementary material for: TNF-α Inhibitors Decrease Classical CD14hiCD16− Monocyte Subsets in Highly Active, Conventional Treatment Refractory Rheumatoid Arthritis and Ankylosing Spondylitis
Source: PubMed Central journal article supplement (PMC6358965; doi:10.3390/ijms20020291), 2019-01-12

Supplementary Figure 1

**A**

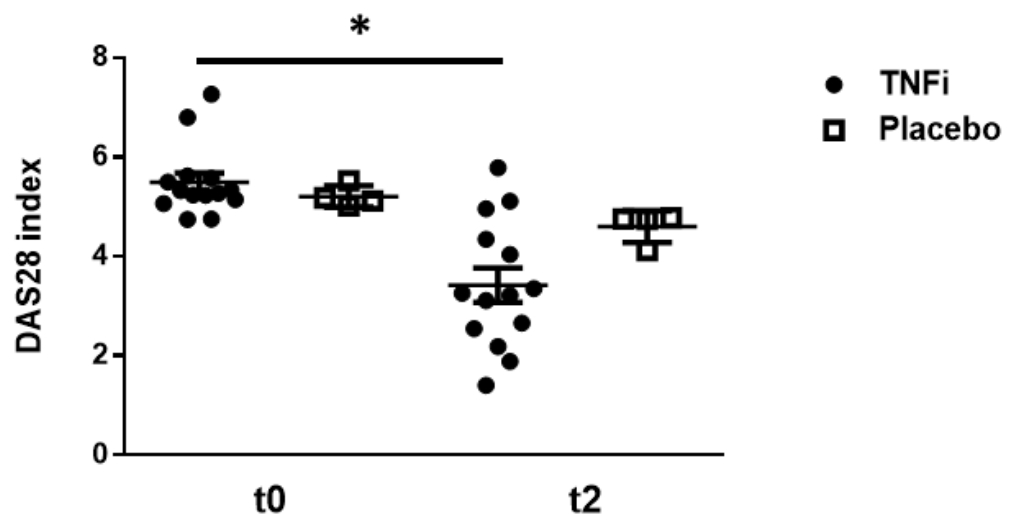

**B**

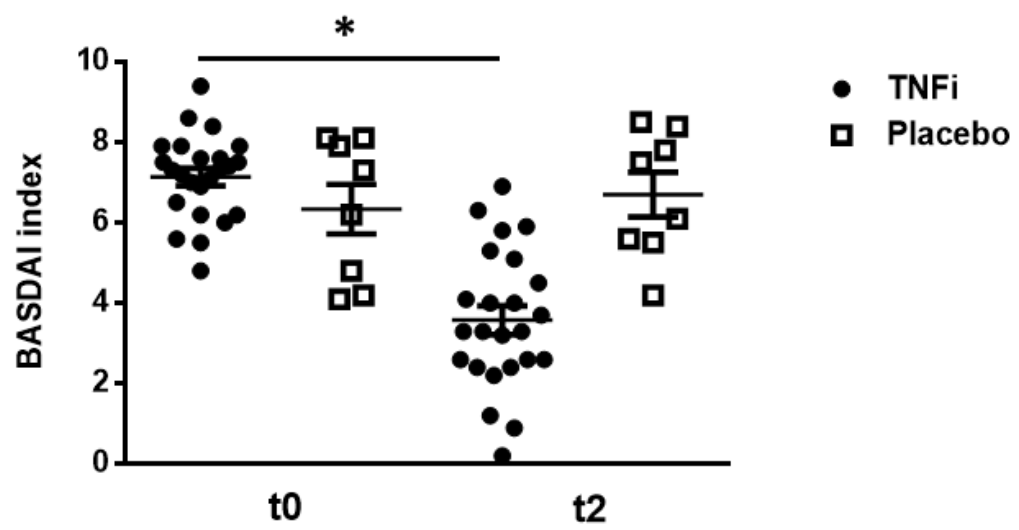

Supplement: ijms-20-00291-s001.pdf [file ijms-20-00291-s001.pdf]
